1 **MAP kinase Slit2p attenuates cell wall mRNA decay by downregulating the**  
2 **RNA-binding protein Rbp1p in response to stress**

3

4

5 Lin-Chun Chang, Yu-Chieh Wu, Yu-Yun Chang and Fang-Jen Lee\*

6

7 Institute of Molecular Medicine, College of Medicine, National Taiwan University, and

8 Department of Medical Research, National Taiwan University Hospital, Taipei,

9 Taiwan.

10

11

12 \*To whom correspondence should be addressed: National Taiwan University

13 Hospital, 7 Chung Shan South Road, Taipei, Taiwan. Tel: +8862-2312-3456 ext.

14 65730. Fax: 8862-2395-7801, Email: fangjen @ ntu.edu.tw

15

16

17 Running head: Slit2p MAPK controls Rbp1p-mediated posttranscriptional regulation

18

19

20 Key words: RNA-binding protein, posttranscriptional regulation, kinase, cell wall stress.

21

22 **Abstract**

23 The yeast cell wall integrity (CWI) MAPK pathway is a signaling cascade function in  
24 maintaining cell wall integrity under stressful environmental conditions. Recently, the  
25 activity and signaling of Slk2p (Mpk1p) MAP kinase has been shown to control  
26 assembly of the processing body (P-body) upon cell wall stresses, implicating its  
27 posttranscriptional role in decay of cell wall mRNAs. However, how Slk2p MAP kinase  
28 directly regulates the stability of cell wall transcripts during cell wall stress remains  
29 unclear. Here, we reported that the RNA-binding protein Rbp1p (Ngr1p) is a  
30 downstream effector and target of Slk2p MAP kinase during activation of the cell wall  
31 stress signaling cascade. In addition to the well-defined target mitochondrial porin  
32 mRNA, we found that Rbp1p also negatively regulates the stability of a subset of  
33 Slk2p-regulated cell wall transcripts. Deletion of *RBP1* increases the level of cell wall  
34 transcripts and partially suppresses the hypersensitivity of the *slk2Δ* deletion strain to  
35 cell wall damage. Slk2p is necessary for cell wall stress-induced stabilization of cell  
36 wall transcripts. Deletion of *RBP1* compromises the destabilization of cell wall  
37 transcripts in *slk2Δ* mutants under cell wall stress. Notably, C-terminal deleted Slk2p  
38 impairs its function in promoting turnover of the Rbp1p protein and fails to stabilize cell  
39 wall transcripts, although it can complement the growth defect of the *slk2Δ* strain upon  
40 cell wall stress. Altogether, our results demonstrate that MAP kinase Slk2p attenuates  
41 CWI mRNA decay in response to cell wall damage by downregulating the activity of  
42 the RNA-binding protein Rbp1p.

43

## 44 **Introduction**

45 In *Saccharomyces cerevisiae*, the degradation of mRNAs is composed of several  
46 processes. Deadenylation of the 3'-poly (A) tail first occurs, followed by decapping of  
47 the 5' end of mRNAs. Both processes expose the internal and vulnerable regions of  
48 mRNAs to be more accessible for 5'-3' exonuclease Xrn1p-directed mRNA hydrolysis  
49 or 3'-5' degradation by the Ski exosome complex [1]. Moreover, mRNA degradation is  
50 facilitated by mRNA-binding proteins (RBPs), such as Rbp1p, Pub1p and Puf family  
51 proteins, which recruit the decay machinery to mRNAs that are tagged for degradation  
52 [2,3]. Proteins involved in mRNA degradation and nontranslating mRNAs assemble  
53 into cytoplasmic foci, which are called processing bodies (P-bodies) and are strongly  
54 induced in response to stress conditions, such as glucose starvation and osmotic and  
55 heat stresses [4-6]. While mRNA degradation has been imaged throughout the  
56 cytoplasm in cells [7-9], most recent models of P-bodies function as storage granules  
57 containing translationally repressed mRNAs and inactive decay enzymes [10].

58

59 We have previously identified the RNA-binding protein Rbp1p, a protein that contains  
60 three RNA recognition motifs (RRMs) and a C-terminal Asn-Met-Pro-rich (NMP)  
61 region and negatively regulates cell growth [11]. *RBP1* is not an essential gene  
62 (systematic name: YBR212W; standard name: *NGR1* (negative growth regulator 1))  
63 due to a slow-growth phenotype in yeast upon overexpression [12]. We found that  
64 Rbp1p binds the 3'-untranslated region (UTR) of mitochondrial porin mRNA via its  
65 RRM domains [13]. This interaction with Rbp1p accelerates the turnover of porin  
66 mRNA in an exonuclease Xrn1p-dependent manner [14]. More recently, findings  
67 suggest that Rbp1p directly binds the nonconserved C-terminal region of RNA  
68 helicase Dhh1p, a component of the mRNA decay machinery. We then proposed that  
69 Rbp1p brings mRNA decay machinery to the vicinity of porin mRNA and promotes the

70 degradation of porin mRNA [3]. In addition to controlling the stability of porin mRNA,  
71 Rbp1p localizes to P-bodies in response to stresses [14]. The Protein Kinase A (PKA)  
72 and High Osmolarity Glycerol (HOG) MAPK pathways have been shown to regulate  
73 the assembly of P-bodies and mRNA decay in response to glucose starvation and  
74 osmotic stress, respectively [15,16]. It remains unclear whether PKA, HOG or other  
75 signaling pathways could control Rbp1p activities in mRNA decay and P-body  
76 localization upon stress.

77

78 Recently, the cell wall integrity (CWI) MAPK pathway has been reported to control  
79 P-body assembly during cell wall stress, implying its posttranscriptional role in the  
80 regulation of gene expression [17]. The CWI pathway monitors cell wall stress as well  
81 as other environmental changes and directs cell wall remodeling accordingly. Factors  
82 that activate CWI signaling range from cell wall stress agents, such as Congo Red, to  
83 unfavorable growing temperatures and osmotic shock [18]. Information on these  
84 stresses is first detected by a variety of cell membrane sensors but eventually  
85 converges to the central molecules, the Slit2p mitogen-activated protein (MAP) kinase  
86 cascade [18]. The Slit2p MAP kinase cascade includes upstream MAPKKK Bck1 and  
87 MAPKKs Mkk1/Mkk2, and the activation of Slit2p requires a series of phosphorylation  
88 events. Two transcription factors, Rlm1p and SB (Swi4p/Swi6p), work downstream of  
89 Slit2p to turn on the transcription of mRNAs, whose protein products are essential for  
90 cell wall repair or remodeling [18,19]. A genome-wide survey revealed that at least 20  
91 functional-related mRNAs were upregulated in an Rlm1p-dependent manner [20].  
92 Moreover, based on global transcriptional analyses, most cell wall-related mRNAs  
93 significantly increased after exposure to cell wall stresses, but this upregulation was  
94 lost in the *slt2Δ* mutant [21]. As Slit2p has indisputable roles in transcriptional  
95 reprogramming and cell wall stress [18], how cell wall integrity signaling and Slit2p

96 MAP kinase manage cell wall stresses at the posttranscriptional level, especially the  
97 stability of cell wall transcripts, is still largely unknown.

98

99 Here, we reveal a novel regulatory role of Slit2p in the stabilization of cell wall  
100 transcripts under cell wall stress. Overexpression of Rbp1p leads to impaired growth  
101 of *slt2Δ* mutants and destabilization of a subset of cell wall transcripts on normal  
102 media, indicating that Rbp1p negatively regulates the stability of cell wall transcripts  
103 that are transcriptionally induced by Slit2p. Deletion of *RBP1* partially rescues the  
104 hypersensitivity of *slt2Δ* mutants and reverts the level of subset cell wall transcripts,  
105 supporting that Rbp1p acts as a negative regulator downstream of MAP kinase Slit2p  
106 signaling. We further found that Slit2p interacts with Rbp1p and enhances Rbp1p  
107 protein degradation through the C-terminal nonkinase region, which attenuates the  
108 negative control of Rbp1p on the stability of cell wall mRNAs upon cell wall stress.  
109 Given the N-terminal conserved kinase domain-regulated transcriptional activity, we  
110 reveal the posttranscriptional regulatory function of Slit2p, which is mainly exerted via  
111 its C-terminal 126 nonconserved amino acids. Slit2p-mediated attenuation of Rbp1p  
112 activity toward cell wall mRNAs could be a feedforward regulation for fine-tuning of  
113 the Slit2p MAP kinase signaling pathway. Therefore, in response to cell wall stress,  
114 Slit2p acts at both the posttranscriptional and transcriptional levels. With the  
115 simultaneous controls of distinct proteins implicated in activation of the cell wall  
116 transcriptome and in the turnover of newly synthesized cell wall mRNAs, Slit2p  
117 ensures the availability of cell wall components for further remodeling.

118

119 **Results**

120 ***RNA-binding protein Rbp1p promotes decay of a subset of cell wall transcripts***

121 To investigate whether cell wall stress and the cell wall integrity pathway control the  
122 posttranscriptional regulatory activity of Rbp1p, wild-type and *slt2Δ* mutants were  
123 transformed individually with a high copy-based plasmid expressing the GFP-tagged  
124 *RBP1* gene under ADH promoter control [3,13,14]. Interestingly, a significant growth  
125 defect was observed for *slt2Δ* mutants expressing Rbp1p compared to wild-type cells  
126 (Figure 1A left panel). Psp1p is another negative growth regulator whose  
127 overexpression results in growth inhibition [12]. We examined whether  
128 overexpression of Psp1p can cause impaired growth of *slt2Δ* mutant cells. Intriguingly,  
129 the growth of *slt2Δ* mutants expressing Psp1p was normal compared to that of  
130 wild-type cells (Figure 1A right panel and S1A), indicating that the impaired growth  
131 phenotype of *slt2Δ* mutants caused by the expression of Rbp1p is specific and  
132 biologically significant.

133

134 We hypothesized that the cell growth defect caused by *RBP1* overexpression in the  
135 *slt2Δ* background might be a consequence of posttranscriptional regulation of cell wall  
136 mRNAs by Rbp1p. To examine this, the half-life of cell wall mRNAs was assessed in  
137 wild-type cells carrying the empty vector of Rbp1p. Because chemical transcriptional  
138 inhibitors are problematic for determining mRNA half-life and regulatable promoter  
139 systems are suggested [22], we took advantage of the YTC345 strain that harbors a  
140 temperature-sensitive mutant of RNA polymerase II (*rpb1-1*), allowing transcriptional  
141 shut off after shifting to the nonpermissive temperature [23]. Northern blotting  
142 analyses showed that excess Rbp1p accelerated the degradation of cell wall mRNAs,  
143 including *SED1*, *BGL2*, and *CWP1* mRNAs (Figure 1B and S1B). The turnover rates  
144 of *HSP150* mRNA, whose expression is also regulated by Slp2p during cell wall stress

145 [20], were similar in either empty vector or Rbp1p overexpression (Figure 1B),  
146 indicating that Rbp1p may negatively regulate the stability of a subset of cell wall  
147 mRNAs.

148

149 To prove the potential role of endogenous Rbp1p in cell wall mRNA decay, we  
150 employed another cell wall mRNA, *SRL1*. We first confirmed that the steady-state  
151 level of *SRL1* mRNA was decreased upon overexpression of Rbp1p in wild-type cells  
152 (Figure 1C left panel), whereas it was increased as *SED1* mRNA in the absence of  
153 *RBP1* (Figure 1D left panel). We then determined whether the levels of *SRL1* mRNA  
154 in overexpressing or the absence of *RBP1* are attributed to Rbp1p-mediated mRNA  
155 decay. We measured the half-life of *SRL1* mRNA in the YTC345 strain in which *RBP1*  
156 was overexpressed or deleted. After shut off transcription, northern blotting analyses  
157 showed that the half-life of *SRL1* mRNA was reduced in wild-type cells  
158 overexpressing Rbp1p (Figure 1C middle and right panel) but prolonged in *rbp1Δ*  
159 mutants (Figure 1D middle and right panel). The turnover rates of *SRL1* mRNA show  
160 differences in yeast cells between cultures in synthetic and rich media (Figure 1C and  
161 1D), which has been observed in previous reports [24,25]. Together, these results  
162 support that Rbp1p negatively regulates the stability of a subset of cell wall mRNAs.

163

164 ***Deletion of RBP1 partially rescues the cell wall integrity of the slt2Δ mutant***  
165 ***upon cell wall stress***

166 Our above results suggest that Rbp1p may have a role in the cell wall integrity  
167 pathway and that Slt2p is required to enable yeast cells to adapt to cell wall stresses.  
168 Slt2p is the central component of the cell wall integrity response, and deletion of *SLT2*  
169 causes yeast cell hypersensitivity to cell wall antagonists, such as Congo Red,  
170 Calcofluor White, and Caffeine [26-28]. *SED1*, *BGL2*, *CWP1*, and *SRL1*, whose

171 mRNAs are under Rbp1p-mediated decay (Figure 1), are also known for their  
172 transcriptional upregulation by Sl2p in response to cell wall stress [21]. Considering  
173 that Rbp1p targets a subset of Sl2p-regulated cell wall mRNAs, we investigated  
174 whether loss of *RBP1* shows resistance to different cell wall stresses. We first used  
175 Congo Red, a dye that binds to chitin, since the cell wall-related transcriptional  
176 response via Sl2p has been extensively demonstrated in yeast [21]. When *rbp1* $\Delta$   
177 mutants exert a moderate survival advantage compared to wild-type cells under  
178 Congo Red treatment (Figure 2A), deletion of *RBP1* partially suppresses the  
179 hypersensitivity of *slt2* $\Delta$  mutants to Congo Red (Figure 2B). To prevent clone biases,  
180 we analyzed two *slt2* $\Delta$ *rbp1* $\Delta$  colonies, both of which showed similar strength of growth  
181 rescue (Figure 2B).

182

183 Caffeine is a natural purine analog. Yeast lacking *SLT2* are unable to grow on  
184 medium containing caffeine, presumably because of their weakened cell wall.  
185 However, caffeine caused cell wall perturbation largely independent of the Rlm1p  
186 transcriptional factor and excessive phosphorylation of Sl2p that is not seen in  
187 response to Congo Red [29]. When challenged with lethal doses of caffeine [29,30],  
188 *rbp1* $\Delta$  and *slt2* $\Delta$ *rbp1* $\Delta$  mutants did not exhibit rescue of growth compared to wild-type  
189 cells and *slt2* $\Delta$  mutants, respectively (Figure S2A). Growth at elevated temperature  
190 also activates the cell wall integrity pathway [31]. Compared with wild-type cells,  
191 *rbp1* $\Delta$  mutants did not display superior growth at higher cultivation temperatures  
192 (Figure S2B). Collectively, these results indicate that Rbp1p has a stress-specific role  
193 in the Sl2p-regulated cell wall integrity response.

194

195 As stated above, Sl2p is indispensable for the upregulation of genes involved in cell  
196 wall construction and metabolism [21]. We next tested whether *rbp1* $\Delta$  suppresses



197 *slt2Δ* lethality under Congo Red-induced cell wall stress via changes in the  
198 abundance of cell wall mRNAs. After Congo Red treatment, the transcripts of *SED1*,  
199 *CWP1*, and *HSP150* were dramatically increased in wild type and *rbp1Δ* but not in  
200 *slt2Δ* mutants (Figure 2C). Although *rbp1Δ* mutants showed a slight growth increase  
201 compared to wild-type cells in phenotypic assays (Figure 2A), the steady-state levels  
202 of cell wall mRNAs did not show a quantitative increase in *rbp1Δ* mutants compared to  
203 wild-type cells during Congo Red treatment (Figure 2C). However, in *slt2Δrbp1Δ*  
204 mutants, the amounts of *SED1* and *CWP1* mRNAs were significantly increased at the  
205 late induction time points (90 and 120 min) compared with *slt2Δ* mutants, suggesting  
206 that the absence of Rbp1p partially reverts the loss of cell wall mRNAs (Figure 2C),  
207 which may correspondingly rescue the cell wall integrity of *slt2Δ* mutants upon Congo  
208 Red-induced cell wall damage (Figure 2B). Notably, *HSP150* mRNA, which is not a  
209 target of Rbp1p, did not show an increase in *slt2Δrbp1Δ* mutants (Figure 2C).  
210 Together, during the Congo Red-induced cell wall integrity response, deletion of  
211 *RBP1* partially rescues the cell wall integrity of *slt2Δ* mutants, which could be  
212 attributed to increased levels of a subset of Slr2p-regulated cell wall transcripts.

213

#### 214 ***Rbp1p-targeted cell wall transcripts were stabilized upon cell wall stress***

215 Most stress-induced transcriptionally upregulated genes have mRNA stabilization,  
216 indicating that mRNA stabilization contributes to maintaining increased mRNA levels  
217 during stress and that a common factor may exist in the coordination of both  
218 processes [16,32]. For example, Osmotic transcripts are upregulated during  
219 hyperosmotic shock by increasing the levels of transcription and mRNA half-life [16].  
220 MAP kinase Hog1p of the HOG pathway controls both transcriptional induction and  
221 stability of osmo-responsive mRNAs [16,32]. Thus, we first investigated whether cell  
222 wall stress modulates the stability of cell wall transcripts. Wild-type YTC345 yeast

223 cells were treated with or without Congo Red at permissive temperature for two hours  
224 and then transferred to nonpermissive temperature to shut off transcriptional activity.  
225 Northern blotting was applied to measure the half-life of cell wall mRNAs. As shown in  
226 Figure S3, cell wall transcripts, *SED1*, *CWP1*, and *BGL2* mRNAs, were stabilized  
227 after treatment with Congo Red. This result demonstrates that a subset of cell wall  
228 mRNAs was stabilized in response to cell wall stress.

229

230 We next examined whether MAP kinase Slt2p is involved in stress-induced  
231 stabilization of cell wall transcripts. To test this hypothesis, we compared the turnover  
232 rates of those mRNAs that responded quickly to Congo Red treatment in YTC345  
233 wild-type cells and *slt2Δ* mutants. As shown in Figure 3A, upon cell wall stress, the  
234 average half-life of *SED1* mRNA was more than 60 minutes in wild-type cells, while it  
235 was reduced to approximately 30 minutes in *slt2Δ* mutants. A comparable half-life  
236 reduction was observed with *BGL2*, *CWP1*, and *HSP150* mRNAs, agreeing that MAP  
237 kinase Slt2p regulates cell wall gene expression at both transcriptional and transcript  
238 turnover levels.

239

240 Removing *RBP1* relieved the loss of cell wall mRNAs in *slt2Δ* mutants treated with  
241 Congo Red (Figure 2C). Similar suppression activity of *rbp1Δ* mutants was observed  
242 when examining the half-life of Rbp1p-targeted cell wall mRNAs in *slt2Δrbp1Δ*  
243 mutants. Upon Congo Red treatment, the half-life of *SED1* and *BGL2* mRNAs in  
244 *slt2Δrbp1Δ* mutants increased to approximately 60 minutes, similar to that in wild-type  
245 cells, while only approximately 30 minutes in *slt2Δ* mutants (Figure 3B). We also  
246 compared the stability of cell wall transcripts in both wild-type and *rbp1Δ* mutant cells  
247 upon cell wall stress. However, the half-life of the examined cell wall mRNAs was  
248 similar between wild-type and *rbp1Δ* mutant cells (data not shown), reminiscing that in

249 Figure 2C, the amount of cell wall mRNAs did not show a significant increase in *rbp1Δ*  
250 mutants compared to wild-type cells during Congo Red treatment. We further discuss  
251 it in the Discussion. Altogether, the reduced cell wall mRNA stability in *slt2Δ* mutants  
252 reverted in *slt2Δrbp1Δ* mutants indicated that Rbp1p-mediated cell wall mRNA decay  
253 is critical for the regulation of gene expression during cell wall stress and suggested  
254 that Rbp1p plays a role downstream of Slt2p in regulating the stabilization of cell wall  
255 mRNAs.

256

### 257 ***Slit2p directly interacts with Rbp1p in response to cell wall stress***

258 Slit2p contains a highly conserved N-terminal MAP kinase domain, which shares a  
259 similar activation mechanism from yeast to humans. However, the extended  
260 C-terminal region of Slit2p is functionally unclear but is assumed to regulate its own  
261 kinase activity [33]. As the genetic interaction of Rbp1p and Slit2p during cell wall  
262 stress is recognized, we further investigated whether Rbp1p is a potential  
263 downstream effector of Slit2p in response to cell wall stress. We first observed that  
264 full-length Slit2p showed a strong interaction with Rbp1p in a yeast two-hybrid assay  
265 (Figure 4A and 4B). Deleting the last 126 amino acids of Slit2p (Slit2p-dC126)  
266 completely abolished the Slit2p-Rbp1p interaction, while Slit2p with a slightly shorter  
267 deletion (Slit2p-dC115) showed no defect in binding Rbp1p (Figure 4A and 4B).  
268 However, expression of the C-terminal 126-residue of Slit2p alone is not sufficient for  
269 its interaction with Rbp1p (Figure S4), implying that the binding of Slit2p to Rbp1p  
270 requires the Slit2p kinase domain and is stabilized by the accessory of the Slit2p  
271 C-terminus.

272

273 Next, we tested whether Slit2p interacts with Rbp1p in a C-terminal-dependent  
274 manner in vivo by coimmunoprecipitation experiments in the yeast strain (Slit2p-HA)

275 with 3xHA tagged into the chromosomal locus of *SLT2*. As expected, Rbp1p was  
276 discovered in Slit2p-HA immunoprecipitates 30 minutes after Congo Red treatment,  
277 indicative of an endogenous interaction of Slit2p and Rbp1p (Figure 4C). Notably, no  
278 interaction of Rbp1p and Slit2p was observed under nonstressed conditions (Congo  
279 Red treatment, 0 min), suggesting that this interaction is accompanied by the  
280 activation of cell wall stress signaling, reflected by the phosphorylation status of Slit2p  
281 (Figure 4C). Activated Slit2p was detected with antibodies directed against  
282 mammalian phosphorylated ERK1/2 [27]. Consistent with the results from yeast  
283 two-hybrid assays, Slit2p with a deleted C-terminus (Slit2p-dC126-HA) was deficient in  
284 the endogenous interaction between Slit2p and Rbp1p upon Congo Red treatment  
285 (Figure 4C). Together, our results showed that Rbp1p is a novel Slit2p-interacting  
286 protein under the stimulation of cell wall stress and that the C-terminal region of Slit2p  
287 is essential for this interaction.

288

### 289 ***Slit2p interaction mediates cell wall stress-induced degradation of Rbp1p***

290 Considering that Rbp1p has an opposing effect to Slit2p on cell wall mRNAs, we  
291 hypothesized that the mRNA decay activity of Rbp1p was attenuated upon cell wall  
292 stress. We examined the protein level of Rbp1p under normal and cell stress  
293 conditions. Rbp1p protein gradually decreased after treatment with Congo Red, while  
294 it showed a comparable amount under normal conditions (Figure S5A), indicating that  
295 cell wall stress induces a decrease in Rbp1p protein. With no fluctuation of *RBP1*  
296 transcripts observed during the course of Congo Red treatment (Figure S5B), we  
297 further examined whether Rbp1p was targeted for degradation during cell wall stress.  
298 Normal growth or Congo Red-treated wild-type cells were subjected to cycloheximide  
299 chase experiments, and the half-life of endogenous Rbp1p was determined  
300 accordingly (Figure 5A). The half-life of Rbp1p protein in normal growth is

301 approximately 16 minutes, while the half-life of Rbp1p protein in yeast exposed to  
302 Congo Red is reduced to approximately 9 minutes, demonstrating that Rbp1p was  
303 subjected to protein degradation in response to cell wall stress (Figure 5A). These  
304 results suggest that cell wall stress could attenuate the RNA decay activity of Rbp1p  
305 through protein degradation.

306

307 The Slit2p MAP kinase cascade has been shown to mediate the destruction of the  
308 downstream transcriptional repressor C-type cyclin in response to oxidative stress  
309 (Krasley et al. 2006). Next, we investigated whether Slit2p is required for the reduction  
310 of Rbp1p protein in yeast cells subjected to cell wall stress. The levels of Rbp1p  
311 protein were reduced in wild-type yeast cells following treatment with Congo Red,  
312 while Rbp1p protein levels remained unchanged in *slt2Δ* mutant cells even two hours  
313 after Congo Red treatment (Figure 4B). This finding suggests that Slit2p and the MAP  
314 kinase cascade may transduce the cell wall stress degradation signal for Rbp1p.

315

316 To obtain better insight into the mechanism underlying this process, we next asked  
317 whether the kinase activity of Slit2p is involved in Rbp1p degradation in response to  
318 cell wall stress. Compared with the expression of wild-type Slit2p, the expression of  
319 the Slit2p kinase-dead version (Slit2p-K54R) in *slt2Δ* mutant cells neither rescued the  
320 cell growth defects properly (Figure S6A and S6B) nor promoted Rbp1p reduction and  
321 degradation efficiently after Congo Red treatment (Figure 4C and S4C). Detection of  
322 phosphorylation at Thr190 and Tyr192 in Slit2p-K54R cells (Figure S4C) [34] indicated  
323 that MAP kinase cascade signaling is intact and that the kinase activity of Slit2p is  
324 indispensable for Rbp1p degradation.

325

326 Similar defects in cell growth and Rbp1p degradation are exhibited in *slt2Δ* mutant  
327 cells expressing inactive SlT2p-TA/YF (Figure S6A, S6B, and S6D), whose activation  
328 loop phosphoracceptors, Thr190 and Tyr192, are mutated to avoid receiving signals  
329 from upstream MAPKKs Mkk1/Mkk2 (Figure S6A) [34]. Failure to detect  
330 phospho-SlT2p along with stabilization of Rbp1 protein after Congo Red treatment  
331 highlights the importance of MAP kinase cascade signaling in Rbp1p degradation  
332 (Figure S6D). Given that the kinase activity of SlT2p is essential for the activation of  
333 the downstream transcription factor Rlm1p under cell wall stress [35-37], here, we  
334 demonstrated that the cell wall integrity signaling and kinase activity of SlT2p are both  
335 required for the degradation of the Rbp1p protein in response to cell wall stress.

336

337 To further determine whether the SlT2p-Rbp1p interaction mediated this degradation  
338 process, we examined endogenous Rbp1p protein levels in *slt2Δ* mutant cells  
339 expressing wild-type SlT2p or truncated SlT2p-dC126 upon Congo Red treatment.  
340 Western blot analysis showed that Rbp1p protein from cells expressing SlT2p-dC126  
341 was more stable than that from cells expressing SlT2p after Congo Red treatment for  
342 more than 2 hours (Figure 5D). Interestingly, SlT2p-dC126 is properly phosphorylated  
343 in response to cell wall stress signals, an event that reflects the activation of SlT2p,  
344 indicating that the removal of the C-terminal Rbp1p-interacting region of SlT2p has no  
345 effect on biochemical behavior in response to cell wall stress. Together, our  
346 observations suggested that SlT2p downregulates the protein level of Rbp1p upon cell  
347 wall stress and that the interaction between SlT2p and Rbp1p is indispensable for this  
348 process.

349

350 ***SlT2p stabilizes cell wall transcripts upon cell wall stress via interaction with***  
351 ***Rbp1p***

352 To prove that MAP kinase Sl2p stabilizes a subset of cell wall transcripts during cell  
353 wall stress by downregulating Rbp1p activity, we first examined the transcriptional  
354 activity of Sl2p-dC126 upon the Congo Red-induced cell wall integrity response. The  
355 levels of *SED1*, *BGL2*, *CWP1* and *HSP150* mRNAs in *slt2Δ* mutant cells expressing  
356 wild-type Sl2p were fairly induced after Congo Red treatment for 2 hours (Figure 6A).  
357 However, in *slt2Δ* mutant cells expressing Sl2p-dC126, the mRNA levels of *SED1*  
358 and *BGL2* were induced but much less than those in cells expressing Sl2p, especially  
359 after treatment with Congo Red for 90 and 120 mins (Figure 6A). The reduced  
360 steady-state levels of a subset of cell wall mRNAs at late time points of cell wall stress  
361 leads us to speculate that this could be caused by the loss of interaction of  
362 Sl2p-dC126 with Rbp1p to attenuate Rbp1p-mediated cell wall mRNA decay activity.

363

364 To test this possibility, we examined the turnover rates of cell wall mRNAs in  
365 YTC345*slt2Δ* mutants expressing full-length Sl2p or Sl2p-dC126 upon cell wall  
366 stress. We speculated that Sl2p lacking the C-terminal Rbp1p-interacting region  
367 would not restore the stabilization of cell wall mRNAs as efficiently as the wild-type  
368 protein because of its failure to interact with endogenous Rbp1p (Figure 3C) to  
369 mediate Rbp1p protein degradation (Figure 5D). Northern blotting showed that in  
370 YTC345*slt2Δ* mutants expressing wild-type Sl2p, *SED1* mRNA was stable, and the  
371 turnover rate was restored to more than 60 min upon cell wall stress (Figure 6B).  
372 However, in cells expressing truncated Sl2p-dC126, *SED1* mRNA was more liable  
373 and reduced its turnover rate to lower than half after Congo Red treatment (Figure 6B).  
374 The same conclusion comes with *BGL2* and *CWP1* mRNAs (Figure 6B). These  
375 results demonstrated that 126 C-terminal amino acids, Rbp1p-interacting regions, are  
376 required for Sl2p to stabilize a subset of stress-induced cell wall mRNAs.

377

378 Interestingly, in contrast to Rbp1p-targeted cell wall transcripts, the amount and  
379 half-life of *HSP150* mRNA increased in *slt2Δ* mutants expressing Slit2p-dC126  
380 compared to those expressing full-length Slit2p (Figure 6A and 6B), implying that for  
381 different subsets of cell wall transcripts, Slit2p may exert different regulatory  
382 mechanisms via its C-terminal extension.

383

384 We further examined whether the C-terminal deleted variants of Slit2p still possess  
385 biological functions. Phenotypical rescue experiments showed that Slit2p-dC126, as  
386 Slit2p, fully complemented the death phenotype of *slt2Δ* mutant cells to grow in the  
387 presence of Congo Red (Figure S7B). In contrast, expression of Slit2p-dC142 cannot  
388 rescue the growth defeat of *slt2Δ* mutant cells (Figure S7B), regardless of equal  
389 protein expression levels (Figure S7A). Interestingly, compared to caffeine treatment  
390 (Figure S7C), Slit2p-dC126 shows slightly better growth rescue activity upon Congo  
391 Red-induced cell wall damage (Figure S7B and S7C), implying that the C-terminal  
392 126 residues of Slit2p play different regulatory activities when facing different  
393 environmental conditions.

394



395 **Discussion**

396 Genes that are transcriptionally upregulated by stresses usually have better mRNA  
397 stabilities, implying the need for common factors that coordinate both processes  
398 [16,32]. Microarray approaches have shown that individual RNA-binding proteins  
399 specifically associate with a subset of mRNAs that are functionally related. Hence, an  
400 RNA-binding protein may coordinate the stability of a group of mRNAs rather than  
401 targeting an individual mRNA [38-40]. These observations favor the scenario that  
402 functionally related genes are coregulated as a posttranscriptional operon or RNA  
403 regulon by specific RNA-binding proteins during stresses [41,42]. Here, we provide an  
404 example that meticulous and organized control of mRNA abundance is critical for  
405 yeast cells to adapt to new environmental conditions. In addition to alterations in cell  
406 wall gene transcription, changes in the cell wall mRNA stability of particular subsets  
407 also contribute to cell wall integrity responses. Taking advantage of blocking RNA  
408 polymerase II, we showed that changes in the stability of cell wall mRNAs are coupled  
409 with their transcription rates during Congo Red-induced cell wall stress.

410

411 We have previously shown that Rbp1p binds to the 3'-UTR of mitochondrial *porin*  
412 mRNA and then promotes the turnover of *porin* mRNA [13]. Rbp1p-mediated *porin*  
413 mRNA decay requires the direct interaction of Rbp1p with Dhh1p, a decapping  
414 activator and RNA helicase [3], which subsequently recruits the Xrn1p-dependent  
415 decay machinery [14]. Interestingly, our preliminary works show that Rbp1p may  
416 regulate the stability of several cell wall mRNAs in cooperation with two decapping  
417 activators, Pat1p and Lsm1p, but not Dhh1p, suggesting two classes of  
418 Rbp1p-mediated mRNA decay processes by partnering with different decapping  
419 activators. Lack of Pat1p abolished the formation of P-bodies during Congo  
420 Red-induced cell wall stress [17]. Rbp1p translocates to P-bodies under glucose

421 deprivation or KCl treatment, and the failure of P-body movement disrupts the  
422 regulation of porin mRNA by Rbp1p [14]. Whether Slt2p has an additional function in  
423 Rbp1p localization is still an open question.

424

425 In eukaryotes, mRNAs that encode proteins belonging to the same biological process  
426 usually have coordinated decay as well [43,44]. It is also known that RNA-binding  
427 proteins tend to bind mRNAs sharing similar cellular functions [39,40]. The specificity  
428 of selective mRNAs for degradation is recognized via the cis-acting regulatory  
429 sequences residing in the mRNA untranslated regions [45]. To better understand the  
430 mechanism of Rbp1p-mediated mRNA degradation, it would be noteworthy to  
431 determine if the Rbp1p-targeting cell wall mRNAs harbor any common sequence  
432 motifs by which their stabilities are modulated. In addition, the level of a transcript  
433 within a cell depends on its rate of synthesis and rate of decay. Previous reports  
434 provide evidence that these two processes are integrated, and transcription factors  
435 and promoter elements of genes can directly influence the relative stability of  
436 transcripts that they induce [46,47]. Whether upstream activating sequences (UAS) or  
437 promoter elements of Rbp1p-targeted cell wall transcripts display conservation and  
438 Rbp1p-binding accessibility is also a tempting question for further investigation.

439

440 Erk1/2 and Erk5 are two human orthologs of yeast Slt2p. Sequence alignment of  
441 yeast Slt2p and human Erk1/2 and Erk5 represents a large sequence extension from  
442 the C-terminus of the MAP kinase domain of Slt2p and Erk5 but not Erk1/2.  
443 Expression of human Erk5 in yeast complements the lack of Slt2p and confers Slt2p  
444 function, including temperature and caffeine sensitivity [48,49]. Human Erk1/2 lacking  
445 a longer C-terminal tail was spontaneously phosphorylated when expressed in yeast  
446 and partially rescued the cell wall damage in *slt2Δ* mutants treated with caffeine [33].

447 Removal of the C-terminal 126 residue of Slr2p makes Slr2p-dC126 mimic Erk2 and  
448 spontaneously phosphorylates and partially rescues phenotypic activity during  
449 caffeine challenge [33,34]. In agreement with previous studies, our studies confirmed  
450 that Slr2p-dC126 shows spontaneous phosphorylation and renders cell integrity  
451 activity under Congo Red treatment (Figure 5D, S7A and S7B). The Slr2p MAP kinase  
452 cascade has been shown to mediate destruction of a transcriptional repressor C-type  
453 cyclin in response to oxidative stress [50]. Here, we demonstrated that Slr2p  
454 downregulates the protein level of the RNA-binding protein Rbp1p upon cell wall  
455 stress to inactivate the RNA decay activity of Rbp1p. We found that under normal  
456 growth conditions, a lack of *RBP1* leads to stabilization of the cell wall transcript  
457 (Figure 1D). However, upon cell wall stress, Rbp1p protein undergoes degradation,  
458 and the amount (Figure 2C) and half-life (data not shown) of cell wall transcripts did  
459 not significantly increase in *rbp1Δ* mutant cells compared to wild-type cells. It could be  
460 explained that Slr2p-mediated Rbp1p degradation in wild-type cells is as efficient as  
461 manual deletion of *RBP1* to cause an effect on the stability of cell wall transcripts,  
462 therefore leading to no difference in RNA level and half-life observation.

463

464 Several mammalian signal transduction pathways, including p38 MAPK/SPAK,  
465 phosphoinositide-3-kinase (PI3K) and mammalian target of rapamycin (mTOR), are  
466 known to regulate RNA stability and decay; however, studies addressing the  
467 connections between these signaling pathways and RNA-binding proteins are limited  
468 [51,52]. For example, p38 MAP kinase is an inflammatory response factor that  
469 regulates the stability of many inflammatory mRNAs. MK2, a downstream kinase  
470 effector of p38, directly phosphorylates the mRNA-destabilizing protein tristetraprolin  
471 (TTP). The phosphorylated TTP has changes in stability and subcellular localization,  
472 which in turn reduces the destabilizing activity of TTP in ARE-containing cytokine

473 mRNAs [53,54]. Yeast MAP kinase Sl2p is known for its role in modulating  
474 transcription programs to overcome the duration of cell wall stresses. Sl2p controls  
475 several transcription factors (e.g., Rlm1p and SBF complex Swi4/Swi6p) both  
476 catalytically and noncatalytically, which in turn activate the transcription of cell wall  
477 genes [18,55]. Our results demonstrate that Sl2p has combined effects on cell wall  
478 genes: inducing their transcription and preventing the gene products from degradation  
479 posttranscriptionally. The latter requires Sl2p kinase activity to mediate the  
480 degradation of Rbp1p. Using the Eukaryotic Linear Motif (ELM) resource, we mapped  
481 and narrowed out three putative Sl2p-mediated phosphorylation sites on Rbp1p.  
482 Rbp1p could be a new substrate of Sl2p kinase, and the Sl2p-dependent  
483 phosphorylation of Rbp1p may be crucial for its stability during cell wall stress.  
484 Alternatively, Sl2p-dependent phosphorylation of Rbp1p may change its affinity for  
485 mRNAs or its protein-protein interactions with mRNA decay components. Altogether,  
486 stress-induced cell wall mRNAs are preserved for further translation to supplement  
487 the damaged cell wall.

488

489 Sl2p may regulate mRNAs at the posttranscriptional level via mechanisms other than  
490 modulating mRNA stability. It has been reported that Sl2p phosphorylates the  
491 RNA-binding protein Nab2p following heat shock stress. Nab2p, as a  
492 poly(A)mRNA-binding protein, subsequently dissociates from the mRNA export  
493 receptor Mex67p, which increases the nuclear retention of poly(A)mRNAs but favors  
494 the export of heat shock mRNAs necessary for thermotolerance [56]. Nevertheless,  
495 here, we have proposed a novel regulatory process of the cell wall stress response  
496 via the Sl2p-Rbp1p interaction; to better understand the mechanistic details requires  
497 further study.

498

## 499 **Materials and Methods**

### 500 **Strain, media, and plasmid construction**

501 The yeast strains used in this study are listed in Supplementary Table I. Yeast cells  
502 were grown either in rich medium containing 1% yeast extract, 2% peptone and 2%  
503 glucose or in synthetic media containing 0.67% yeast nitrogen base (without amino  
504 acids) and 2% glucose supplemented with the appropriate nutrients. Yeasts were  
505 transformed by the lithium acetate method [57]. The *SLT2* gene was disrupted in  
506 YTC345 using a Kan disruption cassette amplified by PCR from pFA6-kanMX6 [58].  
507 Strains expressing Slt2p-3HA or Slt2p-dC126-3HA were obtained through insertion of  
508 a 3HA-HIS cassette amplified from pFA6a-3HA-His3MX6 [58]. Disruption or insertion  
509 of each cassette was verified by western blotting. Plasmids were constructed and are  
510 listed in Supplementary Table II.

511

### 512 **Phenotype Analysis**

513 Yeast cultures were grown in YPD-rich or synthetic selection medium to mid-log  
514 phase (OD<sub>600</sub> of ~1.0). Serial 10-fold dilutions were prepared. Five microliters from  
515 each dilution was spotted on YPD plates supplemented with Congo Red, caffeine or  
516 synthetic medium plates containing 2% glucose as the carbon source, incubated at  
517 30°C for days, and photographed.

518

### 519 **Cycloheximide Chase Assay**

520 Growth yeast cells in YPD-rich medium or synthetic selection medium in flasks at 30°  
521 C until the cell density reached OD<sub>600</sub> ~1.0. After cultivation, yeast cells were treated  
522 with Congo Red at a working concentration of 25 µg/ml for 2 hours, followed by the  
523 addition of cycloheximide to 100 µg/ml. Immediately after adding cycloheximide and  
524 equilibrating cell suspensions for 5 min at 30°C, 1 ml of yeast cell suspension was

525 harvested every 15 minutes with added cycloheximide to the microcentrifuge tube,  
526 centrifuged to pellet down yeasts, and frozen to -20°C. Yeast proteins were extracted  
527 using glass beads and TCA methods.

528

### 529 **Yeast two-hybrid assay**

530 The yeast strain YEM1a was cotransformed with different combinations of bait  
531 (pEG202) and prey (pJG4-5) plasmids, and b-galactosidase plate assays were  
532 performed by streaking transformants onto SC-Trp-His plates containing 2%  
533 galactose and 80 mg/ml X-Gal (5-bromo- 4chloro-3-indolyl-b-D-galactoside). The  
534 plates were then incubated at 30°C for 2–3 days.

535

### 536 **Yeast cell extract preparation and western blotting**

537 Extracts were obtained from ~3 OD600 of yeast cells, suspended in 5% TCA and  
538 processed by vigorous vortexing with glass beads. Cell debris was collected by  
539 centrifugation at 13 000 rpm for 10 min, washed with water to remove residual TCA,  
540 centrifuged at 13 000 rpm for 10 min, suspended in SDS-loading buffer and then  
541 heated at 95°C for 5–10 min. For western blotting, all cell extracts were run on 9%  
542 SDS–polyacrylamide gels. Proteins were then transferred to nitrocellulose  
543 membranes and probed with the indicated antibodies. Act1p was used as a loading  
544 control.

545

### 546 **Northern blotting and mRNA decay assay**

547 For steady-state mRNA analysis, cells were grown in synthetic medium lacking the  
548 indicated nutrients and containing 2% glucose to log phase. For mRNA decay  
549 analysis, the yeast strain YTC345 carrying a temperature-sensitive RNA polymerase  
550 II allele (rpb1-1) was grown at 25°C in synthetic medium lacking the indicated

551 nutrients and containing 2% glucose until an OD600 of ~1.25 was attained and then  
552 shifted to a 37°C water bath shaker to block transcription activity of RNA polymerase  
553 II. Aliquots were collected at the indicated time points after transcription shut-off for  
554 total RNA isolation and northern blot analysis. Total RNA was prepared by the hot  
555 acid phenol method, and 10 mg of each total RNA sample was separated by 1.2%  
556 agarose gel electrophoresis in the presence of 3.7% formaldehyde. Transfer to nylon  
557 membrane (Millipore) was achieved by capillary action with 20X SSC. Blots were  
558 probed with <sup>32</sup>P-radiolabeled riboprobes directed against the genes as indicated. The  
559 level of mRNA in the northern blots was determined by quantifying the intensity of  
560 bands using ImageJ software in three independent experiments, normalized against  
561 the intensity of rRNA, and graphed with Microsoft Excel.

562

### 563 **Immunoprecipitation**

564 Exponentially growing cells (OD600 ~10) were disrupted with glass beads in 0.4 ml of  
565 extraction buffer [25 mM HEPES-KOH, pH 7.5, 75 mM KCl, 2 mM MgCl<sub>2</sub>, 0.1%  
566 NP-40, 1 mM DTT, 0.2 mg/ml heparin, 20 U/ml DNase (TaKaRa) and 10 mg/ml  
567 aprotinin, leupeptin, and pepstatin]. Extracts were cleared by centrifugation at 4000 g  
568 for 10 min. Monoclonal anti-HA antibody-conjugated agarose beads (mouse  
569 monoclonal anti-HA-agarose antibody) (Sigma #A2095) were added to the cleared  
570 extracts and incubated at 4°C for 4 h. Beads were washed four times with wash buffer  
571 (25 mM HEPES-KOH, pH 7.5, 75 mM KCl, 2 mM MgCl<sub>2</sub>, 0.1% NP-40), and the bound  
572 complexes were eluted with 50 mM Tris-HCl, pH 8.0, 100 mM NaCl, 10 mM EDTA,  
573 and 1% SDS for 10 min at 65°C. HA-tagged proteins from cell extract and  
574 immunoprecipitate were separated on a 9% SDS-PAGE gel, blotted and hybridized  
575 with anti-Rbp1p or anti-Slt2p antibody for the presence of proteins.

576

577 **Statistical Analysis**

578 GraphPad Prism 5 was used to analyze the significance of repeated experiments.

579

580 **Acknowledgments**

581 The authors thank Drs. Woan-Yuh Tarn and Tien-Hsien Chang for critical reading of  
582 the manuscript.

583

584 **Funding**

585 Funding for open access charge: National Health Research Institutes, Taiwan, R.O.C.  
586 (NHRI-EX94-9222BI, NHRI-EX96-9513SI) and the Center of Precision Medicine  
587 from the Featured Areas Research Center Program within the framework of the  
588 Higher Education Sprout Project by the Ministry of Education in Taiwan to F.-J.S.L.

589

590 **Author contributions**

591 L.C. Chang and F.-J. S. Lee. designed the study and interpreted the results. L.C. Chang,  
592 Y.-C. Wu, and Y.-Y. Chang performed the experiments and analyzed the data. L.C.  
593 Chang and Y.-C. Wu prepared the draft of the manuscript. L.C. Chang and F.-J. S. Lee  
594 wrote and edited the manuscript.

595

596 **Conflict of interest statement**

597 None declared.

598

599 **References**

- 600 1. Garneau NL, Wilusz J, Wilusz CJ (2007) The highways and byways of mRNA decay.  
601 Nat Rev Mol Cell Biol 8: 113-126.
- 602 2. Parker R, Sheth U (2007) P bodies and the control of mRNA translation and  
603 degradation. Mol Cell 25: 635-646.
- 604 3. Chang LC, Lee FJ (2012) The RNA helicase Dhh1p cooperates with Rbp1p to  
605 promote porin mRNA decay via its non-conserved C-terminal domain. Nucleic  
606 Acids Res 40: 1331-1344.
- 607 4. Teixeira D, Sheth U, Valencia-Sanchez MA, Brengues M, Parker R (2005) Processing  
608 bodies require RNA for assembly and contain nontranslating mRNAs. RNA 11:  
609 371-382.
- 610 5. Sheth U, Parker R (2003) Decapping and decay of messenger RNA occur in  
611 cytoplasmic processing bodies. Science 300: 805-808.
- 612 6. Jain S, Parker R (2013) The discovery and analysis of P Bodies. Adv Exp Med Biol  
613 768: 23-43.



- 614 7. Horvathova I, Voigt F, Kotrys AV, Zhan Y, Artus-Revel CG, et al. (2017) The  
615 Dynamics of mRNA Turnover Revealed by Single-Molecule Imaging in Single  
616 Cells. *Mol Cell* 68: 615-625 e619.
- 617 8. Tutucci E, Vera M, Biswas J, Garcia J, Parker R, et al. (2018) An improved MS2  
618 system for accurate reporting of the mRNA life cycle. *Nat Methods* 15: 81-89.
- 619 9. Tutucci E, Livingston NM, Singer RH, Wu B (2018) Imaging mRNA In Vivo, from  
620 Birth to Death. *Annu Rev Biophys* 47: 85-106.
- 621 10. Luo Y, Na Z, Slavoff SA (2018) P-Bodies: Composition, Properties, and Functions.  
622 *Biochemistry* 57: 2424-2431.
- 623 11. Lee FJ, Moss J (1993) An RNA-binding protein gene (RBP1) of *Saccharomyces*  
624 *cerevisiae* encodes a putative glucose-repressible protein containing two RNA  
625 recognition motifs. *J Biol Chem* 268: 15080-15087.
- 626 12. Akada R, Yamamoto J, Yamashita I (1997) Screening and identification of yeast  
627 sequences that cause growth inhibition when overexpressed. *Mol Gen Genet*  
628 254: 267-274.
- 629 13. Buu LM, Jang LT, Lee FJ (2004) The yeast RNA-binding protein Rbp1p modifies the  
630 stability of mitochondrial porin mRNA. *J Biol Chem* 279: 453-462.
- 631 14. Jang LT, Buu LM, Lee FJ (2006) Determinants of Rbp1p localization in specific  
632 cytoplasmic mRNA-processing foci, P-bodies. *J Biol Chem* 281: 29379-29390.
- 633 15. Ramachandran V, Shah KH, Herman PK (2011) The cAMP-dependent protein  
634 kinase signaling pathway is a key regulator of P body foci formation. *Mol Cell*  
635 43: 973-981.
- 636 16. Romero-Santacreu L, Moreno J, Perez-Ortin JE, Alepuz P (2009) Specific and  
637 global regulation of mRNA stability during osmotic stress in *Saccharomyces*  
638 *cerevisiae*. *RNA* 15: 1110-1120.
- 639 17. Garcia R, Pulido V, Orellana-Munoz S, Nombela C, Vazquez de Aldana CR, et al.  
640 (2019) Signalling through the yeast MAPK Cell Wall Integrity pathway controls  
641 P-body assembly upon cell wall stress. *Sci Rep* 9: 3186.
- 642 18. Levin DE (2011) Regulation of cell wall biogenesis in *Saccharomyces cerevisiae*:  
643 the cell wall integrity signaling pathway. *Genetics* 189: 1145-1175.
- 644 19. Garcia R, Sanz AB, Rodriguez-Pena JM, Nombela C, Arroyo J (2016) Rlm1  
645 mediates positive autoregulatory transcriptional feedback that is essential for  
646 Slt2-dependent gene expression. *J Cell Sci* 129: 1649-1660.
- 647 20. Jung US, Levin DE (1999) Genome-wide analysis of gene expression regulated by  
648 the yeast cell wall integrity signalling pathway. *Mol Microbiol* 34: 1049-1057.
- 649 21. Garcia R, Bermejo C, Grau C, Perez R, Rodriguez-Pena JM, et al. (2004) The global  
650 transcriptional response to transient cell wall damage in *Saccharomyces*

- 651 cerevisiae and its regulation by the cell integrity signaling pathway. *J Biol*  
652 *Chem* 279: 15183-15195.
- 653 22. Eshleman N, Luo X, Capaldi A, Buchan JR (2020) Alterations of signaling pathways  
654 in response to chemical perturbations used to measure mRNA decay rates in  
655 yeast. *RNA* 26: 10-18.
- 656 23. Muhlrاد D, Decker CJ, Parker R (1995) Turnover mechanisms of the stable yeast  
657 PGK1 mRNA. *Mol Cell Biol* 15: 2145-2156.
- 658 24. Munchel SE, Shultzaberger RK, Takizawa N, Weis K (2011) Dynamic profiling of  
659 mRNA turnover reveals gene-specific and system-wide regulation of mRNA  
660 decay. *Mol Biol Cell* 22: 2787-2795.
- 661 25. Garcia-Martinez J, Delgado-Ramos L, Ayala G, Pelechano V, Medina DA, et al.  
662 (2016) The cellular growth rate controls overall mRNA turnover, and  
663 modulates either transcription or degradation rates of particular gene  
664 regulons. *Nucleic Acids Res* 44: 3643-3658.
- 665 26. Martin H, Castellanos MC, Cenamor R, Sanchez M, Molina M, et al. (1996)  
666 Molecular and functional characterization of a mutant allele of the  
667 mitogen-activated protein-kinase gene SLT2(MPK1) rescued from yeast  
668 autolytic mutants. *Curr Genet* 29: 516-522.
- 669 27. Martin H, Rodriguez-Pachon JM, Ruiz C, Nombela C, Molina M (2000) Regulatory  
670 mechanisms for modulation of signaling through the cell integrity  
671 Slt2-mediated pathway in *Saccharomyces cerevisiae*. *J Biol Chem* 275:  
672 1511-1519.
- 673 28. de Nobel H, Ruiz C, Martin H, Morris W, Brul S, et al. (2000) Cell wall perturbation  
674 in yeast results in dual phosphorylation of the Slt2/Mpk1 MAP kinase and in  
675 an Slt2-mediated increase in FKS2-lacZ expression, glucanase resistance and  
676 thermotolerance. *Microbiology* 146 ( Pt 9): 2121-2132.
- 677 29. Kuranda K, Leberre V, Sokol S, Palamarczyk G, Francois J (2006) Investigating the  
678 caffeine effects in the yeast *Saccharomyces cerevisiae* brings new insights  
679 into the connection between TOR, PKC and Ras/cAMP signalling pathways.  
680 *Mol Microbiol* 61: 1147-1166.
- 681 30. Harrison JC, Zyla TR, Bardes ES, Lew DJ (2004) Stress-specific activation  
682 mechanisms for the "cell integrity" MAPK pathway. *J Biol Chem* 279:  
683 2616-2622.
- 684 31. Kamada Y, Jung US, Piotrowski J, Levin DE (1995) The protein kinase C-activated  
685 MAP kinase pathway of *Saccharomyces cerevisiae* mediates a novel aspect of  
686 the heat shock response. *Genes Dev* 9: 1559-1571.

- 687 32. Molin C, Jauhiainen A, Warringer J, Nerman O, Sunnerhagen P (2009) mRNA  
688 stability changes precede changes in steady-state mRNA amounts during  
689 hyperosmotic stress. *RNA* 15: 600-614.
- 690 33. Levin-Salomon V, Maayan I, Avrahami-Moyal L, Marbach I, Livnah O, et al. (2009)  
691 When expressed in yeast, mammalian mitogen-activated protein kinases lose  
692 proper regulation and become spontaneously phosphorylated. *Biochem J* 417:  
693 331-340.
- 694 34. Goshen-Lago T, Goldberg-Carp A, Melamed D, Darlyuk-Saadon I, Bai C, et al.  
695 (2016) Variants of the yeast MAPK Mpk1 are fully functional independently of  
696 activation loop phosphorylation. *Mol Biol Cell* 27: 2771-2783.
- 697 35. Dodou E, Treisman R (1997) The *Saccharomyces cerevisiae* MADS-box  
698 transcription factor Rlm1 is a target for the Mpk1 mitogen-activated protein  
699 kinase pathway. *Mol Cell Biol* 17: 1848-1859.
- 700 36. Watanabe Y, Takaesu G, Hagiwara M, Irie K, Matsumoto K (1997)  
701 Characterization of a serum response factor-like protein in *Saccharomyces*  
702 *cerevisiae*, Rlm1, which has transcriptional activity regulated by the Mpk1  
703 (Slr2) mitogen-activated protein kinase pathway. *Mol Cell Biol* 17: 2615-2623.
- 704 37. Jung US, Sobering AK, Romeo MJ, Levin DE (2002) Regulation of the yeast Rlm1  
705 transcription factor by the Mpk1 cell wall integrity MAP kinase. *Mol Microbiol*  
706 46: 781-789.
- 707 38. Hogan DJ, Riordan DP, Gerber AP, Herschlag D, Brown PO (2008) Diverse  
708 RNA-binding proteins interact with functionally related sets of RNAs,  
709 suggesting an extensive regulatory system. *PLoS Biol* 6: e255.
- 710 39. Gerber AP, Herschlag D, Brown PO (2004) Extensive association of functionally  
711 and cytotopically related mRNAs with Puf family RNA-binding proteins in  
712 yeast. *PLoS Biol* 2: E79.
- 713 40. Duttagupta R, Tian B, Wilusz CJ, Khounh DT, Soteropoulos P, et al. (2005) Global  
714 analysis of Pub1p targets reveals a coordinate control of gene expression  
715 through modulation of binding and stability. *Mol Cell Biol* 25: 5499-5513.
- 716 41. Keene JD, Tenenbaum SA (2002) Eukaryotic mRNPs may represent  
717 posttranscriptional operons. *Mol Cell* 9: 1161-1167.
- 718 42. Keene JD (2007) Biological clocks and the coordination theory of RNA operons  
719 and regulons. *Cold Spring Harb Symp Quant Biol* 72: 157-165.
- 720 43. Wang Y, Liu CL, Storey JD, Tibshirani RJ, Herschlag D, et al. (2002) Precision and  
721 functional specificity in mRNA decay. *Proc Natl Acad Sci U S A* 99: 5860-5865.
- 722 44. Yang E, van Nimwegen E, Zavolan M, Rajewsky N, Schroeder M, et al. (2003)  
723 Decay rates of human mRNAs: correlation with functional characteristics and  
724 sequence attributes. *Genome Res* 13: 1863-1872.

- 725 45. Wilusz CJ, Wormington M, Peltz SW (2001) The cap-to-tail guide to mRNA  
726 turnover. *Nat Rev Mol Cell Biol* 2: 237-246.
- 727 46. Bregman A, Avraham-Kelbert M, Barkai O, Duek L, Guterman A, et al. (2011)  
728 Promoter elements regulate cytoplasmic mRNA decay. *Cell* 147: 1473-1483.
- 729 47. Trcek T, Larson DR, Moldon A, Query CC, Singer RH (2011) Single-molecule mRNA  
730 decay measurements reveal promoter- regulated mRNA stability in yeast. *Cell*  
731 147: 1484-1497.
- 732 48. Truman AW, Millson SH, Nuttall JM, King V, Mollapour M, et al. (2006) Expressed  
733 in the yeast *Saccharomyces cerevisiae*, human ERK5 is a client of the Hsp90  
734 chaperone that complements loss of the Slt2p (Mpk1p) cell integrity  
735 stress-activated protein kinase. *Eukaryot Cell* 5: 1914-1924.
- 736 49. Kim KY, Truman AW, Levin DE (2008) Yeast Mpk1 mitogen-activated protein  
737 kinase activates transcription through Swi4/Swi6 by a noncatalytic  
738 mechanism that requires upstream signal. *Mol Cell Biol* 28: 2579-2589.
- 739 50. Krasley E, Cooper KF, Mallory MJ, Dunbrack R, Strich R (2006) Regulation of the  
740 oxidative stress response through Slt2p-dependent destruction of cyclin C in  
741 *Saccharomyces cerevisiae*. *Genetics* 172: 1477-1486.
- 742 51. Schoenberg DR, Maquat LE (2012) Regulation of cytoplasmic mRNA decay. *Nat*  
743 *Rev Genet* 13: 246-259.
- 744 52. Venigalla RK, Turner M (2012) RNA-binding proteins as a point of convergence of  
745 the PI3K and p38 MAPK pathways. *Front Immunol* 3: 398.
- 746 53. Brook M, Tchen CR, Santalucia T, McIlrath J, Arthur JS, et al. (2006)  
747 Posttranslational regulation of tristetraprolin subcellular localization and  
748 protein stability by p38 mitogen-activated protein kinase and extracellular  
749 signal-regulated kinase pathways. *Mol Cell Biol* 26: 2408-2418.
- 750 54. Sandler H, Stoecklin G (2008) Control of mRNA decay by phosphorylation of  
751 tristetraprolin. *Biochem Soc Trans* 36: 491-496.
- 752 55. Levin DE (2005) Cell wall integrity signaling in *Saccharomyces cerevisiae*.  
753 *Microbiol Mol Biol Rev* 69: 262-291.
- 754 56. Carmody SR, Tran EJ, Apponi LH, Corbett AH, Wentz SR (2010) The  
755 mitogen-activated protein kinase Slt2 regulates nuclear retention of non-heat  
756 shock mRNAs during heat shock-induced stress. *Mol Cell Biol* 30: 5168-5179.
- 757 57. Ito H, Fukuda Y, Murata K, Kimura A (1983) Transformation of intact yeast cells  
758 treated with alkali cations. *J Bacteriol* 153: 163-168.
- 759 58. Longtine MS, McKenzie A, 3rd, Demarini DJ, Shah NG, Wach A, et al. (1998)  
760 Additional modules for versatile and economical PCR-based gene deletion  
761 and modification in *Saccharomyces cerevisiae*. *Yeast* 14: 953-961.
- 762

763

764 **Figure Legends**

765 **Figure 1. Rbp1p promotes the decay of a subset of Slf2p-regulated cell wall**  
766 **transcripts.**

767 (A) Overexpression of Rbp1p impaired the growth of *slt2Δ* mutant cells. BY4741  
768 wild-type and *slt2Δ* mutant cells were transformed with GFP-RBP1-pVT101U (left  
769 panel) or GFP-PSP1-pVT101U (right panel) and spread onto SD-URA media for 2 to  
770 3 days of culture at 30°C. (B and C) Overexpression of Rbp1p accelerates the  
771 turnover rate of a subset of cell wall mRNAs. YTC345 (*rpb1-1*) strains carrying a  
772 high-copy plasmid bearing *RBP1* or empty vector were grown in synthetic selective  
773 medium at permissive temperature to log-phase and then shifted to nonpermissive  
774 temperature to shut off transcription for the indicated times. (D) Lack of *RBP1*  
775 increased the stability of cell wall mRNA. Wild-type YTC345 (*rpb1-1*) strains or  
776 *rbp1ΔΔ* mutants were grown in YPD-rich medium at permissive temperature to  
777 log-phase and then shifted to nonpermissive temperature to shut off transcription for  
778 the indicated times. Northern blotting analysis of total RNA was performed with  
779 specific probes to monitor the remaining levels of mRNA. rRNAs served as a loading  
780 control. The levels of each mRNA were quantified by ImageJ and normalized relative  
781 to those of rRNAs.  $t_{1/2}$  indicates the half-life of mRNAs and was calculated by one  
782 phase decay. Standard deviations are indicated. Statistical analysis using two-way  
783 ANOVA demonstrates the significance of decay kinetics.

784

785 **Figure 2. Deletion of *RBP1* partially rescues the cell wall integrity of the**  
786 ***slt2Δ* mutant upon cell wall stress**

787 (A and B) Deletion of *RBP1* partially rescues the impaired growth of *slt2Δ* mutant cells.  
788 BY4741 wild-type, *slt2Δ*, *rbp1Δ*, or *slt2Δrbp1Δ* mutants were grown to log phase in

789 rich medium, serially tenfold diluted and spotted onto rich agar medium in the  
790 presence of Congo Red (10 or 25  $\mu\text{g/ml}$ ) and then incubated at 30°C for 2 to 3 days.  
791 (C) Deletion of *RBP1* partially restores the induced levels of cell wall mRNAs in  
792 response to cell wall stress. BY4741 wild-type, *slt2 $\Delta$* , *rbp1 $\Delta$* , or *slt2 $\Delta$ rbp1 $\Delta$*  mutants  
793 were grown to log phase in rich medium and then treated with 25  $\mu\text{g/ml}$  Congo Red  
794 for the indicated times. Northern blotting analysis of total RNA was performed with  
795 specific probes to monitor the inducing levels of mRNA. rRNAs served as a loading  
796 control. The levels of each mRNA were quantified by ImageJ, normalized relative to  
797 those of rRNAs, and then graphed as fold change of mRNA in 0 min. Standard  
798 deviations are indicated. Statistical analysis using two-way ANOVA from two to three  
799 independent experiments demonstrates the significance of the fold change.

800

801 **Figure 3. Stabilization of a subset of cell wall transcripts in response to cell wall**  
802 **stress depends on Slt2p.**

803 (A) Slt2p is required for stabilization of cell wall mRNAs during cell wall stress.  
804 YTC345 (*rpb1-1*) wild-type or *slt2 $\Delta$*  mutants were grown in rich medium to log-phase  
805 and treated with 25  $\mu\text{g/ml}$  Congo Red for 2 hr. (B) Deletion of *RBP1* rescues the  
806 instability of cell wall mRNAs caused by the absence of Slt2p. YTC345 (*rpb1-1*) *slt2 $\Delta$*   
807 or *slt2 $\Delta$ rbp1 $\Delta$*  mutants were grown in rich medium to log-phase and treated with 25  
808  $\mu\text{g/ml}$  Congo Red for 2 hr. After treatment, the cells were shifted to a nonpermissive  
809 temperature to shut off transcription for the indicated times. Northern blot analysis,  
810 quantification and statistical analysis of (A) and (B) were performed as described in  
811 Figure 1.

812

813 **Figure 4. Slt2p interacts with Rbp1p in response to cell wall stress.**

814 (A) Schematic representation of the SlT2p protein domain structure and C-terminal  
815 truncated variants. (B) SlT2p interaction with Rbp1p requires its C-terminal 126 amino  
816 acids in a yeast two-hybrid assay. YEM1 $\alpha$  cells carrying LexA- and Gal4AD-based  
817 fusion constructs as indicated were assayed for  $\beta$ -galactosidase activity. Western  
818 blotting was used to analyze the expression levels of the indicated fusion proteins. (C)  
819 SlT2p interacts with Rbp1p endogenously in response to cell wall stress through the  
820 C-terminus. BY4741 wild-type cells chromosomally expressing SlT2p-3HA or  
821 SlT2p-dC126-3HA were treated with 25  $\mu$ g/ml Congo Red for the indicated times. Cell  
822 extracts were used for immunoprecipitation with anti-HA antibody-conjugated beads,  
823 followed by western blotting analysis with the indicated antibodies.

824

825 **Figure 5. SlT2p mediates the degradation of Rbp1p in response to cell wall**  
826 **stress.**

827 (A) The turnover rate of Rbp1p is promoted by cell wall stress. Wild-type cells were  
828 treated with either Congo Red or not for 2 hr and then incubated with 100  $\mu$ g/ml  
829 cycloheximide for the indicated times. (B) Rbp1p decreased significantly 120 minutes  
830 after Congo Red treatment in wild cells but remained unchanged in *slt2* $\Delta$  mutants. (C)  
831 The degradation of Rbp1p in response to the cell wall required SlT2p kinase activity.  
832 *slt2* $\Delta$  mutants expressing wild-type *SLT2* or the kinase-dead *K54R* mutant were  
833 pretreated with 25  $\mu$ g/ml Congo Red for 2 hrs, followed by incubation with 100  $\mu$ g/ml  
834 cycloheximide for the indicated times. (D) SlT2p-dC126 fails to decrease Rbp1p  
835 protein during cell wall stress. *slt2* $\Delta$  mutants expressing SlT2p or SlT2p-dC126 were  
836 treated with Congo Red for the indicated times. Western blots show Rbp1p protein  
837 levels in BY4741 cells. The levels of Rbp1p were quantified by ImageJ and  
838 normalized relative to those of Act1p, and then graphed as relative levels of Rbp1p in  
839 0 min (B, D) or  $t_{1/2}$  indicated the half-life of Rbp1p and was calculated by one phase

840 decay (A, C). Standard deviations from three independent experiments are indicated.  
841 Statistical analysis using two-way ANOVA demonstrates the significance of decay  
842 kinetics.

843

844 **Figure 6. The C-terminal Rbp1p-interacting region of SlT2p functions in**  
845 **maintaining the stabilization of Rbp1p-targeted cell wall mRNAs.**

846 (A) SlT2p lacking C-terminal 126 amino acids failed to fully restore the induced levels  
847 of Rbp1p-targeted cell wall mRNAs in response to cell wall stress. BY4741 *slt2Δ*  
848 mutants expressing full-length *SLT2* or *SLT2-dC126* were grown to log phase in  
849 synthetic selection medium and then treated with 25 μg/ml Congo Red for the  
850 indicated times. (B) C-terminal 126 amino acids of SlT2p function in maintaining the  
851 stability of cell wall mRNAs. YTC345 (*rpb1-1*) *slt2Δ* mutants expressing full-length  
852 *SLT2* or *SLT2-dC126* were grown in synthetic selection medium at permissive  
853 temperature to log-phase, treated with 25 μg/ml Congo Red for 2 hrs and then shifted  
854 to nonpermissive temperature to shut off transcription for the indicated times.  
855 Northern blotting analysis of total RNA was performed with specific probes to monitor  
856 the inducing levels of mRNA. rRNAs served as a loading control. The levels of each  
857 mRNA were quantified by ImageJ and normalized relative to those of rRNAs, and  
858 then graphed as fold change of mRNA in 0 min (A) or  $t_{1/2}$  indicated the half-life of  
859 mRNAs and was calculated by one phase decay (B). Standard deviations are  
860 indicated. Statistical analysis using two-way ANOVA from two to three independent  
861 experiments demonstrates the significance of fold change (A) and decay kinetics (B).  
862



Figure 1

A

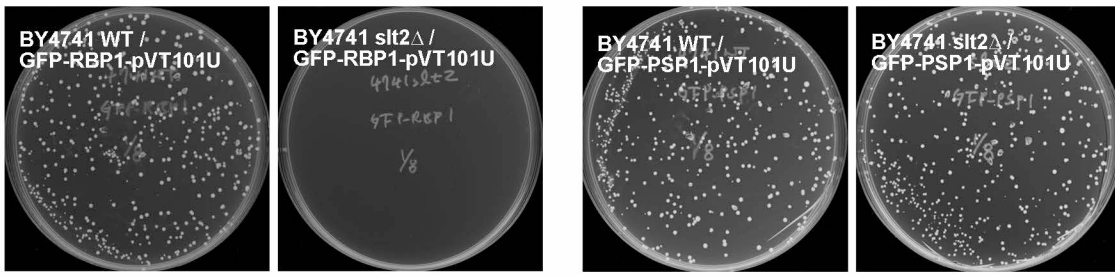

B

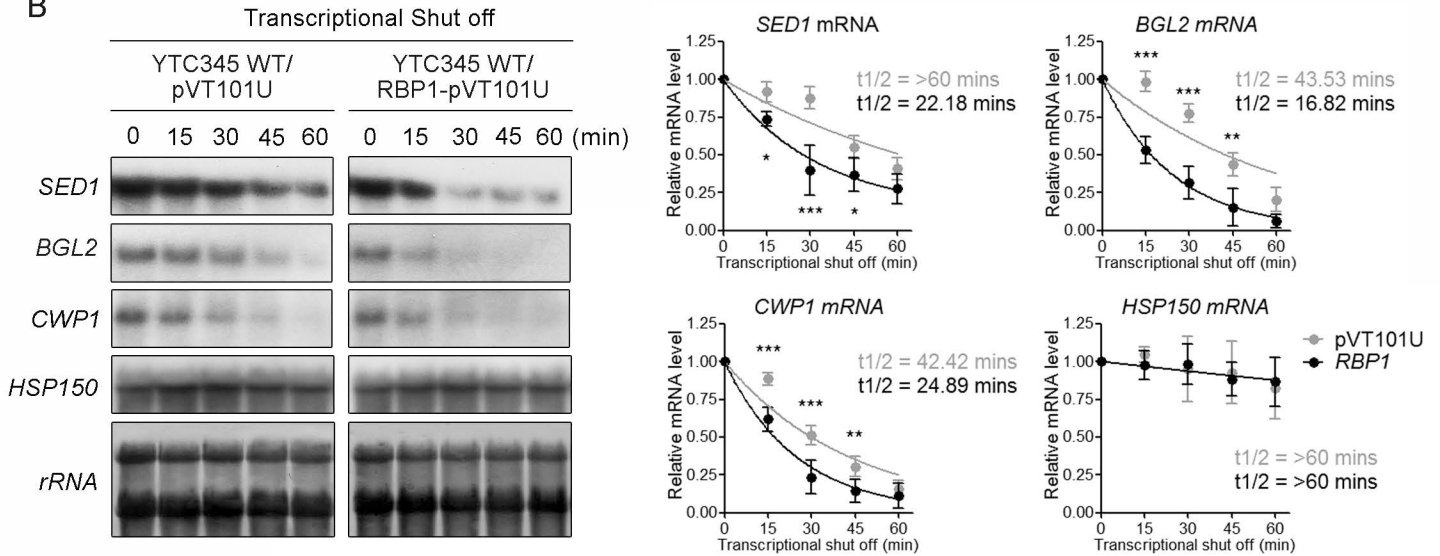

C

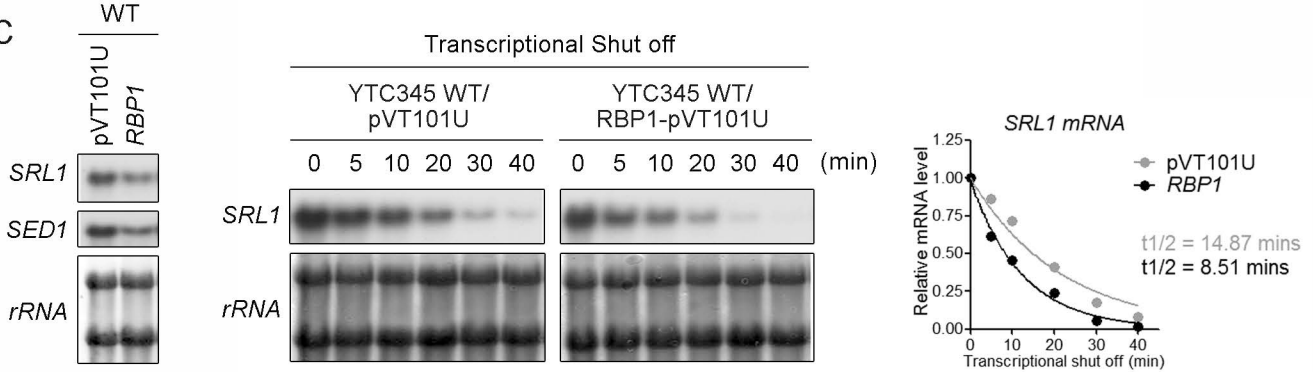

D

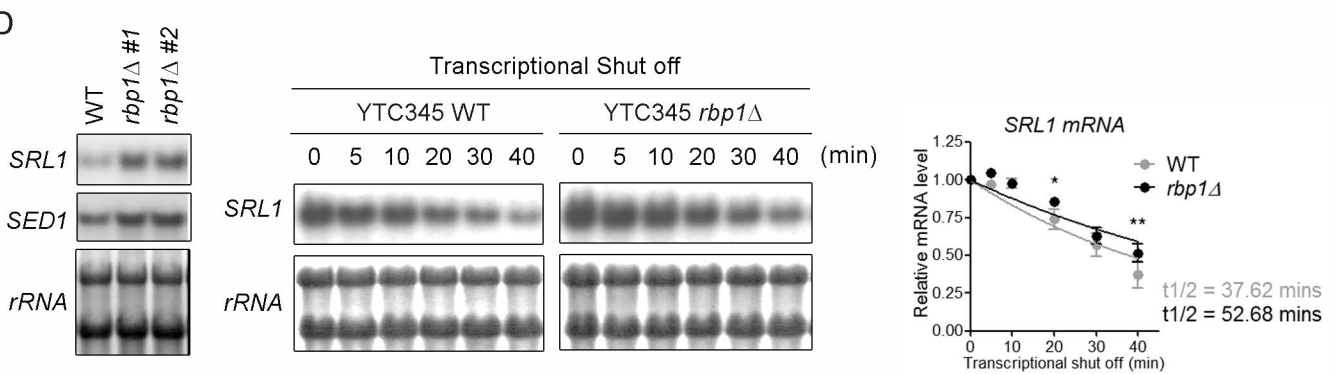

Figure 2

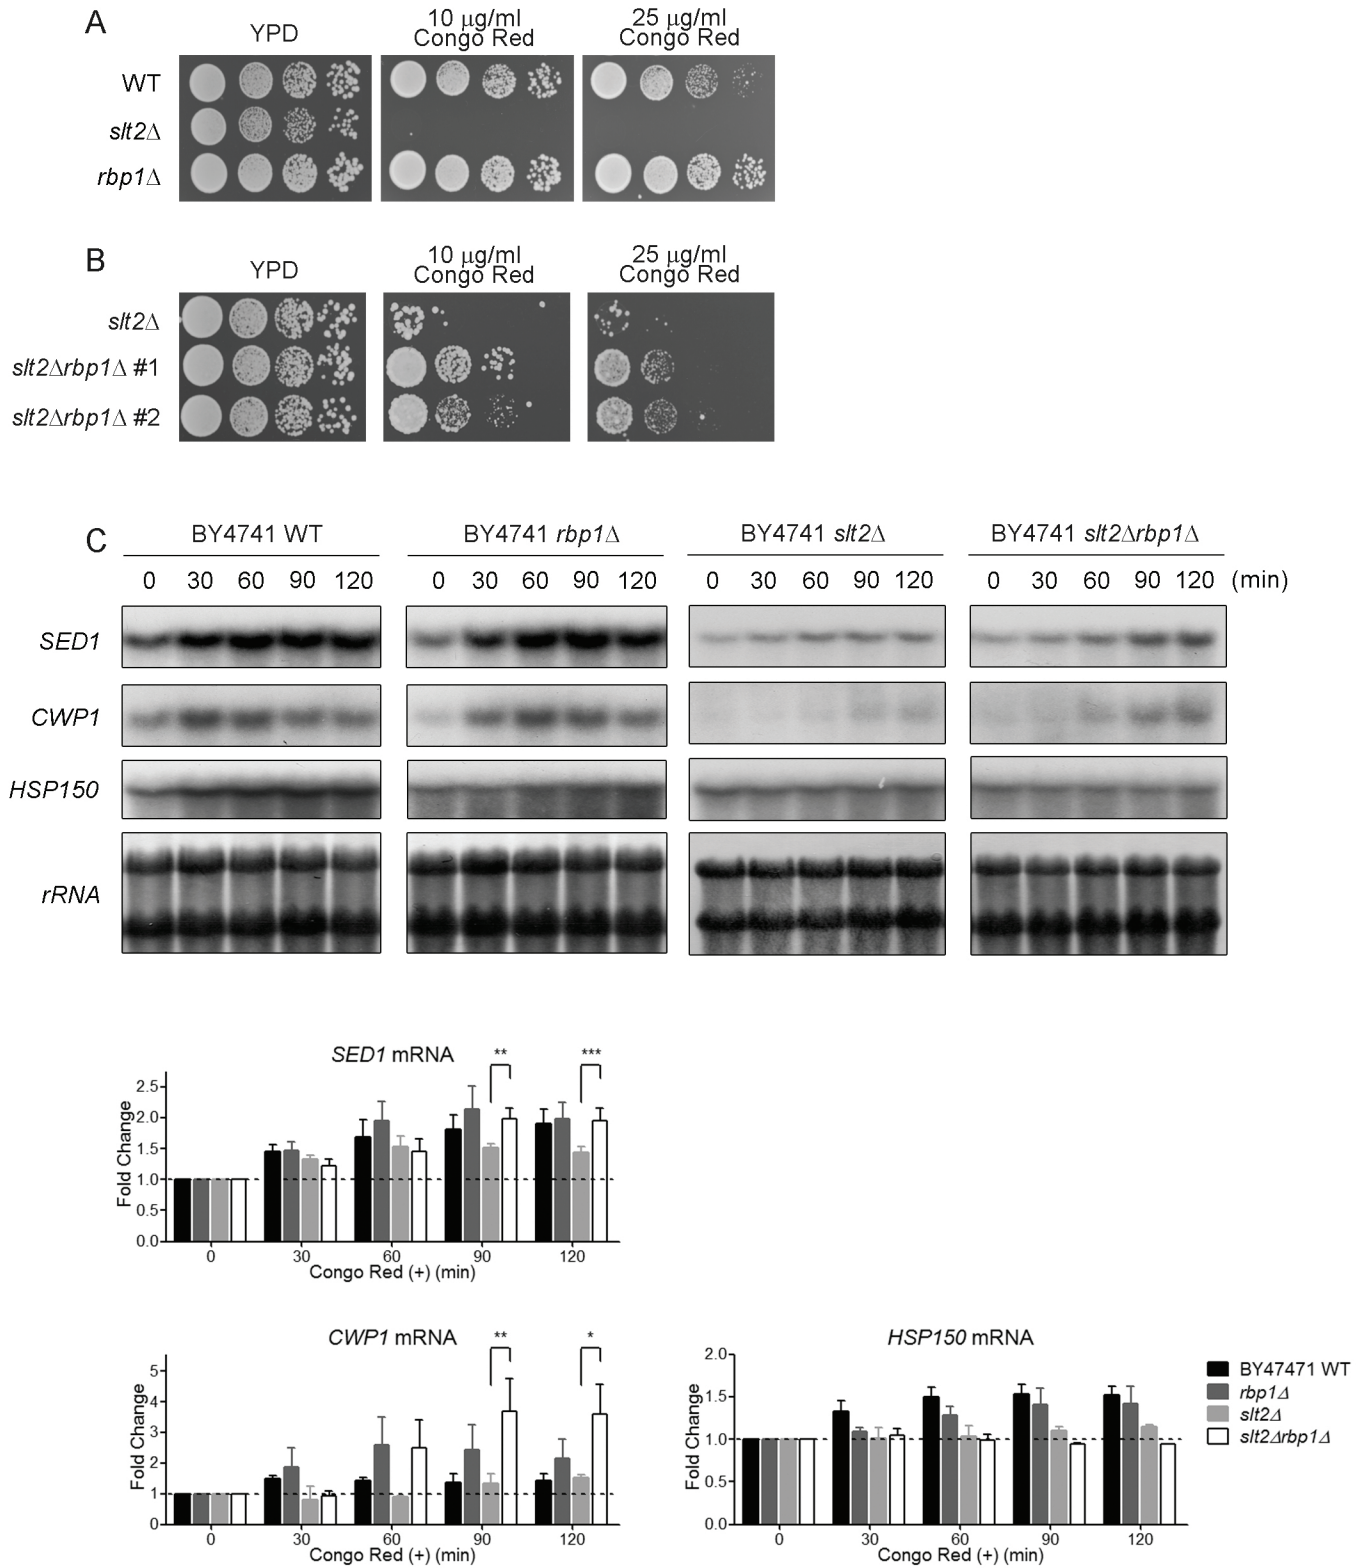

Figure 3

**A** Transcriptional Shut off aftre Congo Red (+)

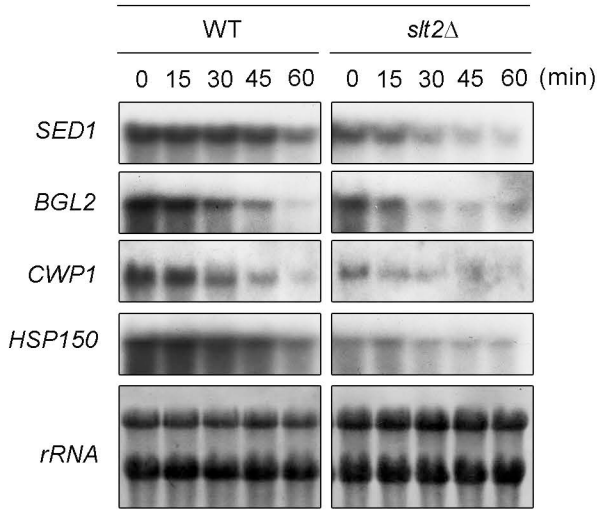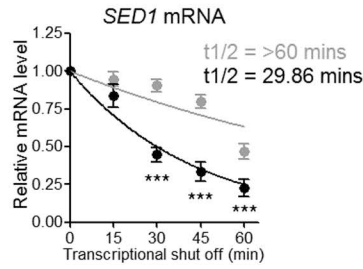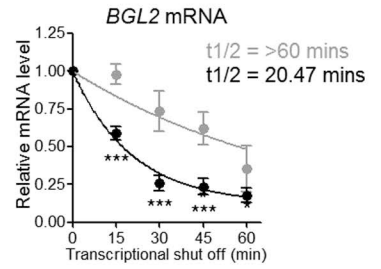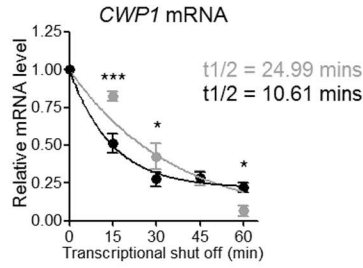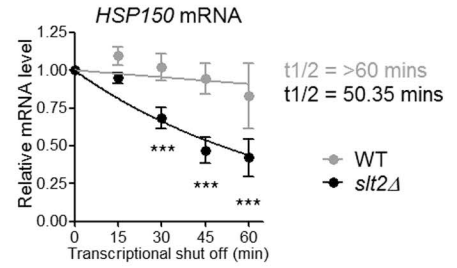

**B** Transcriptional Shut off aftre Congo Red (+)

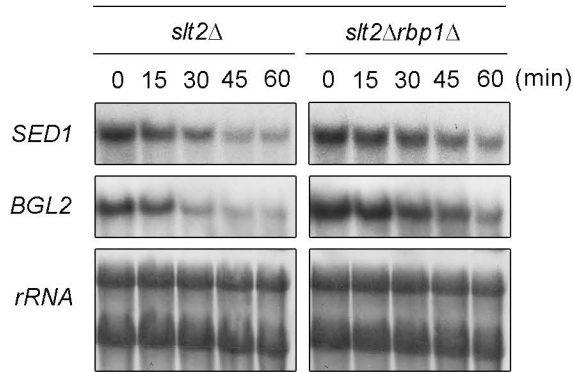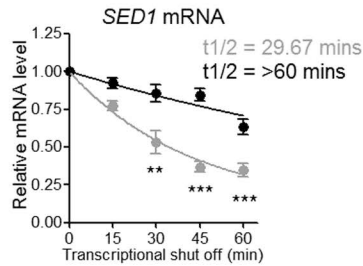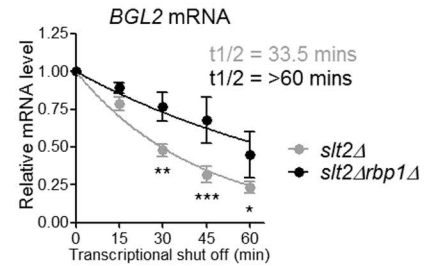

Figure 4

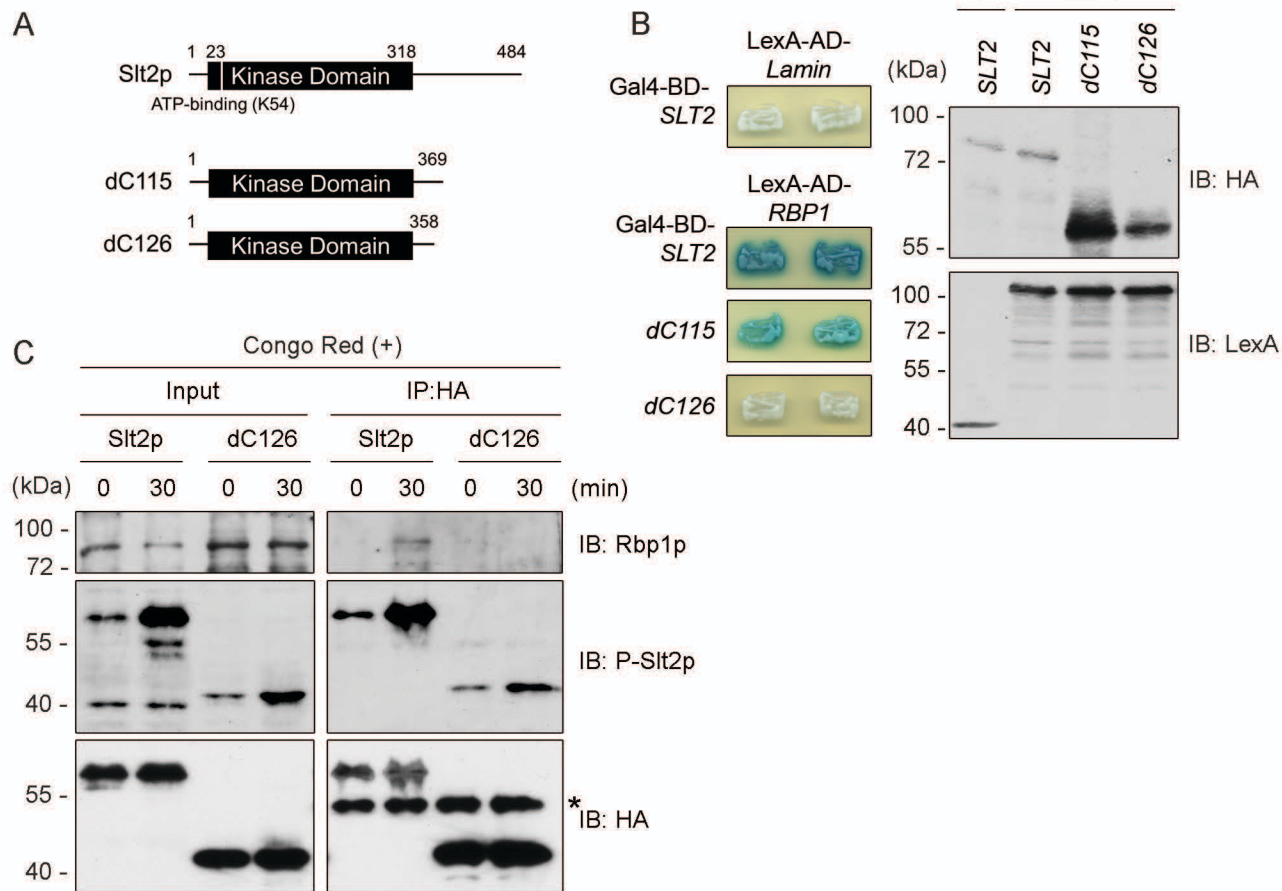

**Figure 5**

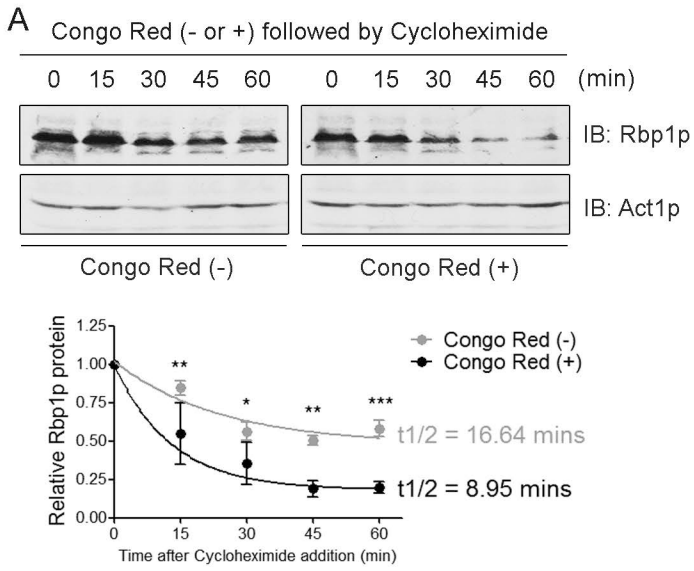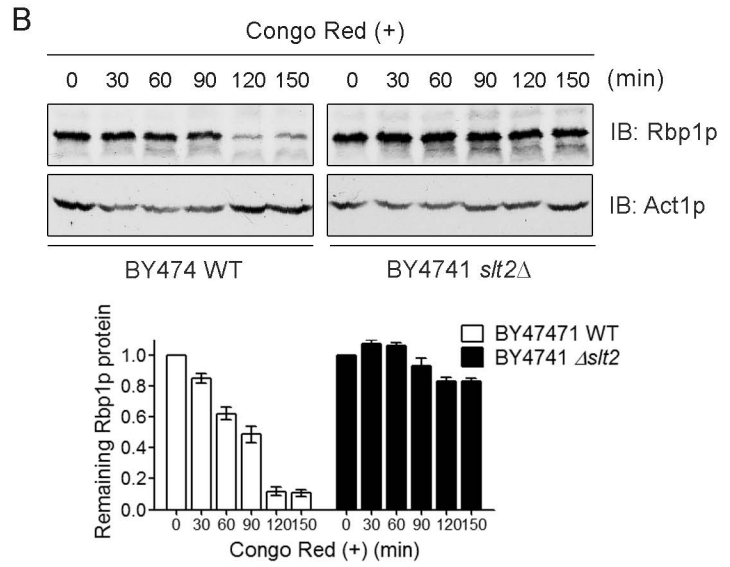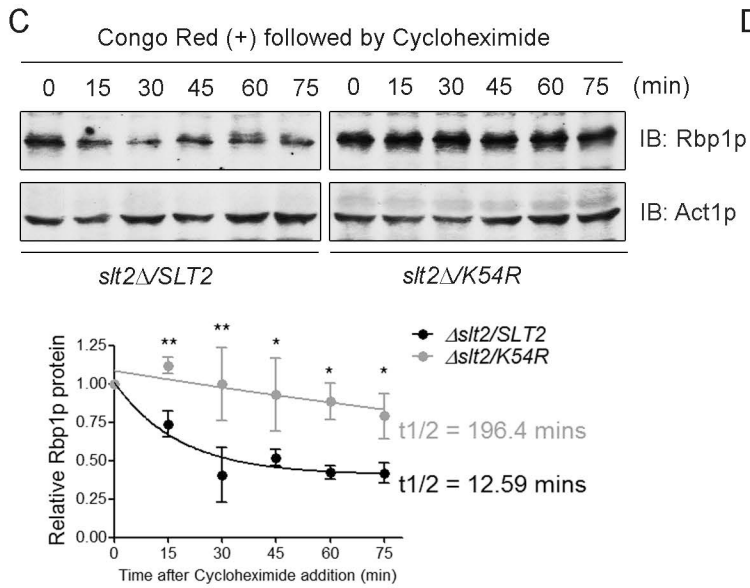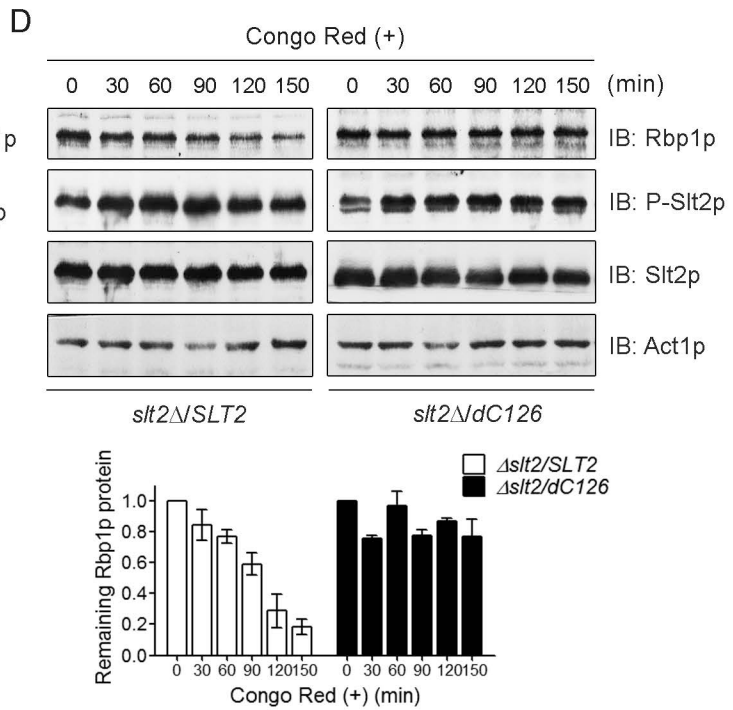

Figure 6

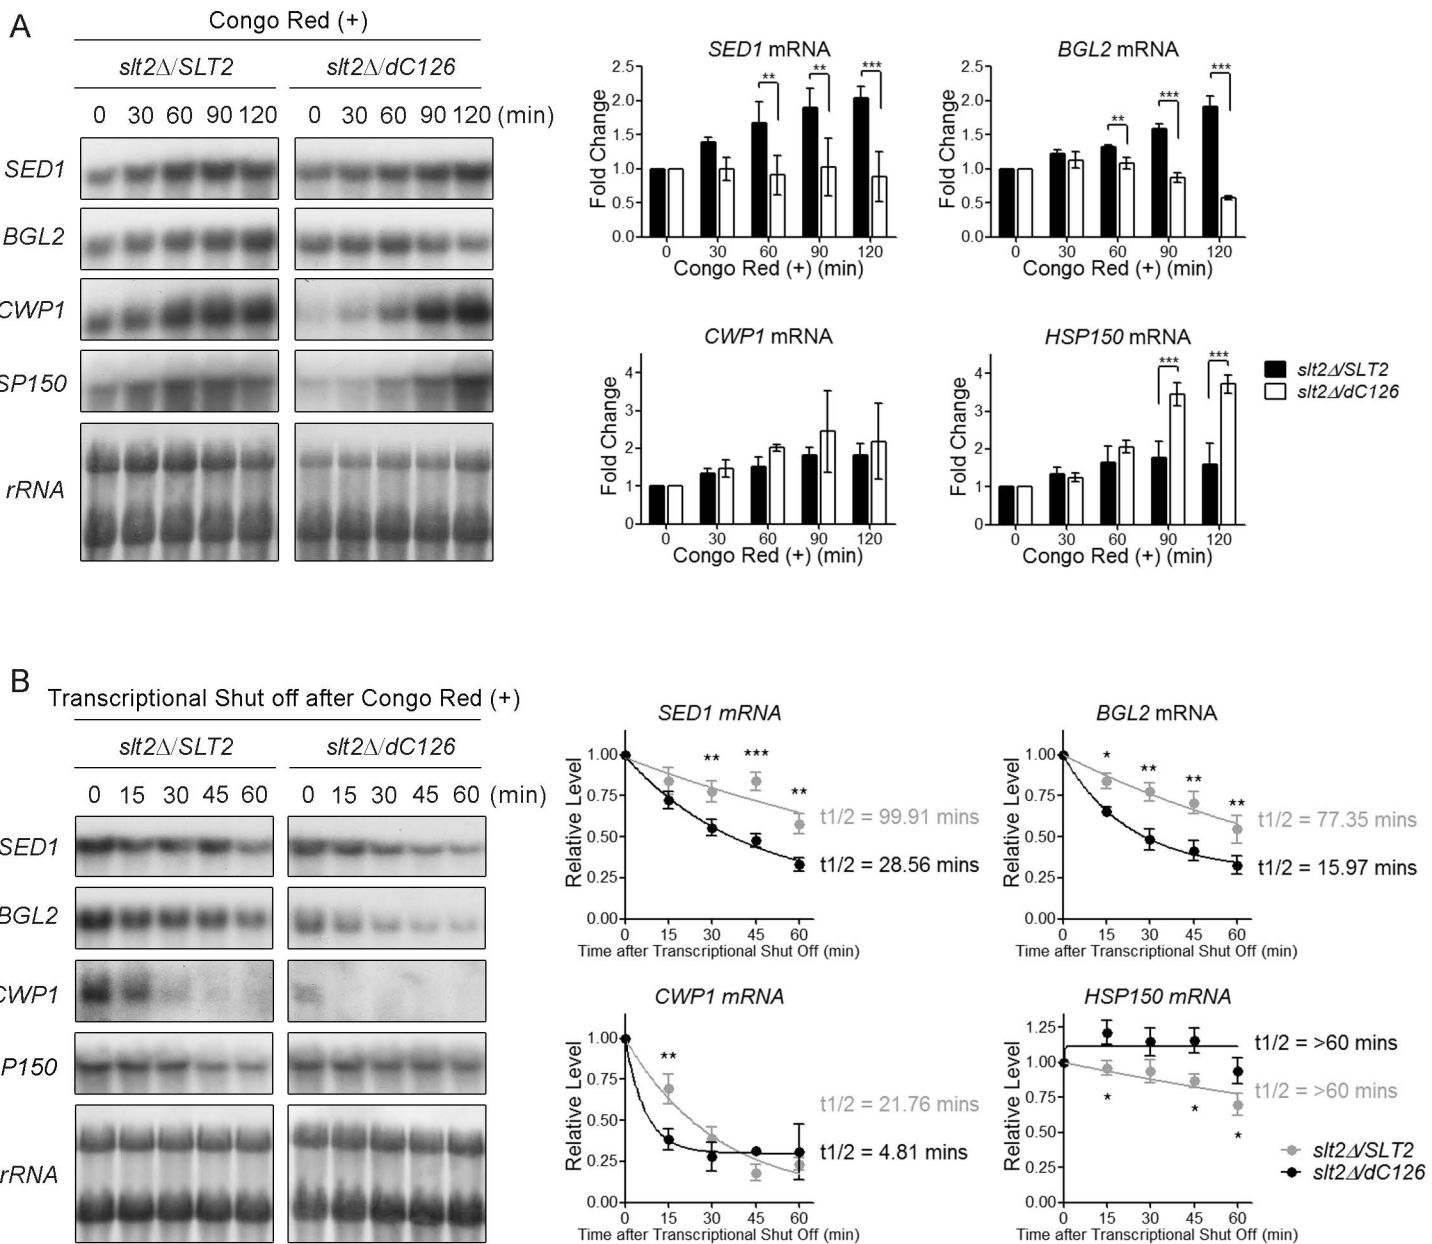

Source: http://biorxiv.org/content/10.1101/2020.09.30.319939v1.full.pdf
